# Supplementary material for: Formation mechanism of overlapping grain boundaries in graphene chemical vapor deposition growth
Source: Chem Sci. 2016 Dec 1;8(3):2209–14. doi: 10.1039/c6sc04535a (PMC5408562; doi:10.1039/c6sc04535a)
Supplement: Supplementary file 1 [file SC-008-C6SC04535A-s001.pdf]

## Electronic Supplementary Information

### Formation Mechanism of Overlapping Grain Boundaries in Graphene Chemical Vapor Deposition Growth

Jichen Dong,<sup>a,b</sup> Huan Wang,<sup>c</sup> Hailin Peng,<sup>c</sup> Zhongfan Liu,<sup>c</sup> Kaili Zhang,<sup>a,\*</sup> Feng  
Ding<sup>b,\*</sup>

<sup>a</sup> Department of Mechanical and Biomedical Engineering, City University of Hong Kong, 83 Tat Chee  
Avenue, Kowloon, Hong Kong

<sup>b</sup> Institute of Textiles and Clothing, Hong Kong Polytechnic University, Kowloon, Hong Kong

<sup>c</sup> College of Chemistry and Molecular Engineering, Peking University, Beijing 100871, P. R. China

\*Corresponding Authors: kaizhang@cityu.edu.hk; feng.ding@polyu.edu.hk

#### 1. Substrate model

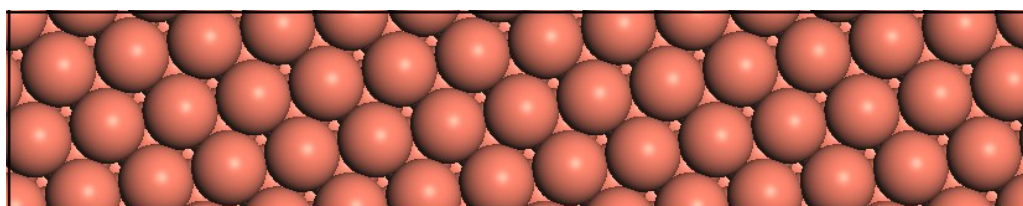

**Fig. S1** Unit cell of the Cu(111) substrate.

#### 2. Calculations on the formation energy of different edges

As a reference, the formation energy of the HTGEs (When the two neighboring graphene ribbons are far apart from each other with their edges terminated by H) is first obtained:

$$E_{F-H} = (E_T - E_{Sub} - N_C \times \varepsilon_C - N_H \times \varepsilon_{H_2} / 2) / 4l, \quad (1)$$

where  $E_T$  is the total energy of the structure,  $E_{Sub}$  is the energy of the metal substrate,  $\varepsilon_C$  and  $\varepsilon_{H_2}$  represent the energy of graphene on substrate per atom and the energy of a  $H_2$  molecule,  $N_C$  and  $N_H$  denote the number of C and H atoms in the structure, and  $l$  is the grain boundary length.  $4l$  is used to account for the four H terminated edges of the of two graphene ribbons in the model.

For the formation energies of CBGB and MPGE, they are calculated as:

$$E_F = (E_T - E_{Sub} - N_C \times \varepsilon_C - N_H \times \varepsilon_{H_2} / 2) / l - 2 \times E_{F-H}, \quad (2)$$

where the second term at the right side is used to cancel out the effect of the H passivated edges of other sides of graphene ribbons.

### 3. Calculation on the Gibbs free energy variation during the overlapping of two HTGEs

The Gibbs free energy change during the overlapping of two HTGEs is defined as

$$\Delta G(N_C) = E_F(N_C) - N_C \times \Delta\mu \quad (3)$$

where  $E_F(N_C)$  is the formation energy of the system,  $N_C$  is the number of C atoms and  $\Delta\mu$  is the chemical potential difference between C source and graphene on substrate. The formation energy of the system is defined by equation (2).

### 4. Calculations on the chemical potential of H<sub>2</sub> and thermodynamic diagrams

The H chemical potential  $\mu_H$  as a function of temperature  $T$  and pressure  $P$  is obtained by<sup>1</sup>:

$$\mu_H = [E_{H_2} - k_B T \ln(g k_B T / P \times \xi_{trans} \xi_{rot} \xi_{vibr})] / 2, \quad (4)$$

where  $E_{H_2}$  is the energy of a H<sub>2</sub> molecule,  $k_B$  is the Boltzmann constant,  $g$  is 2 (accounting for the degree of degeneracy of the electron energy level),  $\xi_{trans}$ ,  $\xi_{rot}$  and  $\xi_{vibr}$  are the partition functions of translation, rotation and vibration motions.

For calculating the thermodynamic diagrams between H passivated grain boundary and substrate passivated grain boundary, the vibration entropy  $\Delta F_V$  is obtained by

$$\Delta F_V = -k_B T \left[ \frac{\beta \hbar \omega}{e^{\beta \hbar \omega} - 1} - \ln(1 - e^{-\beta \hbar \omega}) \right], \quad (5)$$

where  $\beta$  equals  $1/k_B T$ ,  $\omega$  is the vibration frequency of the H atoms at the edges.<sup>2</sup>

The thermodynamic diagrams between H passivated grain boundary and covalent bonding mediated grain boundary are obtained by calculating the Gibbs free energy difference  $\Delta G$  as:

$$\Delta G = \Delta E_T + \Delta F_V - N_H \times \mu_H(T, P), \quad (6)$$

where  $\Delta E_T$  is the total energy difference between the two structures, and the vibration entropy  $\Delta F_V$  is taken by the vibration entropy difference between the H passivated edges and the covalent bonding mediated grain boundary.

**Table S1** Statistics on the angle and type of graphene GBs in our experiments and other references.

| Number          | Angle | OLGB or not |
|-----------------|-------|-------------|
| 1               | 1°    | no          |
| 2               | 1°    | no          |
| 3               | 1°    | no          |
| 4               | 2°    | no          |
| 5               | 4°    | no          |
| 6               | 4°    | no          |
| 7               | 5°    | no          |
| 8 <sup>a</sup>  | 8°    | yes         |
| 9               | 10°   | no          |
| 10              | 10°   | no          |
| 11              | 10°   | no          |
| 12              | 11°   | no          |
| 13              | 11°   | no          |
| 14              | 14°   | yes         |
| 15              | 14°   | yes         |
| 16              | 16°   | yes         |
| 17              | 21°   | no          |
| 18              | 22°   | no          |
| 19              | 23°   | yes         |
| 20              | 23°   | yes         |
| 21              | 23°   | yes         |
| 22 <sup>a</sup> | 24°   | yes         |
| 23 <sup>a</sup> | 26°   | yes         |
| 24 <sup>a</sup> | 28°   | Yes         |
| 25              | 28°   | no          |
| 26              | 30°   | no          |
| 27              | 30°   | no          |

<sup>a</sup> These data are taken from Figures 3, 6 and 8 and in Ref. 3 and Figure S7 in Ref. 4.

## References

- 1 L. D. Landau, E. M. Lifshitz, Statistical Physics, Butterworth, Oxford, 1995.
- 2 K. Reuter, M. Scheffler, *Phys. Rev. B* 2001, **65**, 035406.
- 3 A. W. Robertson, A. Bachmatiuk, Y. A. Wu, F. Schäffel, B. Rellinghaus, B.

Büchner, M. H. Rümmeli, J. H. Warner, *ACS nano* 2011, **5**, 6610.

4 A. W. Tsen, L. Brown, M. P. Levendorf, F. Ghahari, P. Y. Huang, R. W. Havener, C. S. Ruiz-Vargas, D. A. Muller, P. Kim, J. Park, *Science* 2012, **336**, 1143.
